# Supplementary material for: Effect of indocyanine green near-infrared light imaging technique guided lymph node dissection on short-term clinical efficacy of minimally invasive radical gastric cancer surgery: a meta-analysis
Source: Front Oncol. 2023 Sep 11;13:1257585. doi: 10.3389/fonc.2023.1257585 (PMC10520705; doi:10.3389/fonc.2023.1257585)
Supplement: Supplementary Table 2 — The original dataset used in the study. [file Table_2.xlsx]

## Sheet: Sheet1
							Anastomotic leakage		ICGFL		non-ICGFL			Pneumonia		ICGFL		non-ICGFL			Intestinal obstruction		ICGFL		non-ICGFL
Abdominal infection		ICGFL		non-ICGFL			author	year	event_ICG	total_ICG	event_nonICG	total_nonICG		author	year	event_ICG	total_ICG	event_nonICG	total_nonICG		author	year	event_ICG	total_ICG	event_nonICG	total_nonICG
author	year	event_ICG	total_ICG	event_nonICG	total_nonICG		Chen, Q. Y.	2020	3	129	1	129		Chen, Q. Y.	2020	10	129	10	129		Chen, Q. Y.	2020	1	129	3	129
Chen, Q. Y.	2020	2	129	7	129		Cianchi, F.	2020	1	37	1	37		Cianchi, F.	2020	3	37	2	37		Lan, Y.	2017	0	14	1	65
Lan, Y.	2017	1	14	0	65		Huang, Z. N.	2021	0	94	1	94		Huang, Z. N.	2021	9	94	10	94		Lu, X.	2021	1	28	1	28
Liu, M.	2020	0	61	1	75		Lan, Y.	2017	1	14	2	65		Liu, M.	2020	1	61	1	75		Wei, M.	2022	2	107	0	88
Lu, X.	2021	1	28	2	28		Liu, M.	2020	0	61	1	75		Lu, X.	2021	2	28	2	28
Ma, S.	2019	1	38	2	44		Lu, X.	2021	1	28	0	28		Ma, S.	2019	1	38	0	44
							Ma, S.	2019	0	38	1	44		Park, S.	2020	0	20	2	60
							Park, S.	2020	0	20	1	60		Wei, M.	2022	8	107	7	88
							Wei, M.	2022	0	107	1	88
Intra-abdominal bleeding		ICGFL		non-ICGFL			Postoperative complications		ICGFL		non-ICGFL			Clavien-Dindo grade≥Ⅱ		ICGFL		non-ICGFL			Delayed gastric emptying		ICGFL		non-ICGFL
author	year	event_ICG	total_ICG	event_nonICG	total_nonICG		author	year	event_ICG	total_ICG	event_nonICG	total_nonICG		author	year	event_ICG	total_ICG	event_nonICG	total_nonICG		author	year	event_ICG	total_ICG	event_nonICG	total_nonICG
Chen, Q. Y.	2020	2	129	0	129		Alrashidi, N.	2022	20	32	26	36		Alrashidi, N.	2022	12	32	20	36		Chen, Q. Y.	2020	1	129	0	129
Cianchi, F.	2020	0	37	1	37		Chen, Q. Y.	2020	20	129	21	129		Chen, Q. Y.	2020	5	129	6	129		Lan, Y.	2017	0	14	4	65
Huang, Z. N.	2021	1	94	1	94		Cianchi, F.	2020	5	37	5	37		Huang, Z. N.	2021	9	94	11	94		Liu, M.	2020	3	61	2	75
Liu, M.	2020	1	61	1	75		Huang, Z. N.	2021	10	94	12	94		Lee, S.	2022	10	74	18	94		Lu, X.	2021	1	28	6	28
Lu, X.	2021	0	28	1	28		Kwon, I. G.	2019	5	40	4	40		Lu, X.	2021	3	28	7	28		Park, S.	2020	1	20	3	60
Park, S.	2020	0	20	1	60		Lan, Y.	2017	1	14	8	65		Park, S.	2020	0	20	7	60		Wei, M.	2022	1	107	2	88
Wei, M.	2022	1	107	0	88		Lee, S.	2022	50	74	75	94		Tu, R.	2019	3	39	22	663
							Liu, M.	2020	6	61	6	75		Ushimaru, Y.	2019	0	84	0	84
							Lu, X.	2021	7	28	12	28		Wei, M.	2022	4	107	5	88
							Ma, S.	2019	2	38	4	44
							Maruri, I.	2022	7	17	7	17
							Park, S.	2020	1	20	14	60
							Tu, R.	2019	6	39	86	663
							Ushimaru, Y.	2019	2	84	3	84
							Wei, M.	2022	15	107	12	88
Postoperative hospital stay (day)		ICGFL			non-ICGFL				Operative time (min)		ICGFL			non-ICGFL				First flatus (days)		ICGFL			non-ICGFL
author	year	tfmean	tfsd	nt	cfean	cfsd	nc		author	year	tfmean	tfsd	nt	cfean	cfsd	nc		author	year	tfmean	tfsd	nt	cfean	cfsd	nc
Chen, Q. Y.	2020	8.1	5.8	129	8.4	5.3	129		Alrashidi, N.	2022	273.8	77	32	252.2	58.2	36		Chen, Q. Y.	2020	3.5	1	129	3.4	1.3	129
Cianchi, F.	2020	10	3.8	37	10.9	3.8	37		Chen, Q. Y.	2020	196.1	47.8	129	190.4	47.6	129		Huang, Z. N.	2021	3.6	1.2	94	3.4	1.3	94
Huang, Z. N.	2021	7.6	1.4	94	7.9	1.7	94		Chen, X.	2022	290.83	30.69	18	288.16	40.99	38		Liu, M.	2020	3.02	0.72	61	3.07	0.74	75
Kwon, I. G.	2019	6.3	3.1	40	7.2	9.7	40		Cianchi, F.	2020	293.1	61	37	321.2	77.8	37		Ma, S.	2019	3.4	0.8	38	3.4	1.1	44
Lan, Y.	2017	10.1	3.5	14	11.9	12.8	65		Huang, Z. N.	2021	211.3	31.8	94	202.1	51.1	94		Tu, R.	2019	3.5	1.4	39	3.4	1.1	663
Liu, M.	2020	7.55	1.99	61	8.23	5.12	75		Kwon, I. G.	2019	191	39.5	40	209	55.3	40		Wei, M.	2022	2.64	1.13	107	2.84	1.18	88
Lu, X.	2021	13.46	8.92	28	15.71	9.15	28		Lan, Y.	2017	327	79.7	14	349.8	120.9	65
Ma, S.	2019	7	2	38	7.5	2.4	44		Lee, S.	2022	279.3	70.3	74	260.1	62	94
Park, S.	2020	9.95	3.58	20	11.2	8.12	60		Liu, M.	2020	207.21	33.63	61	239.25	44.19	75
Tu, R.	2019	8.6	3.6	39	9.4	5	663		Lu, X.	2021	260.18	46.7	28	277.86	69.15	28
Ushimaru, Y.	2019	7.5	0.1	84	8.7	0.1	84		Ma, S.	2019	172.8	45.8	38	162.6	45.7	44
Wei, M.	2022	9.22	2.48	107	9.26	3.04	88		Park, S.	2020	228.85	33.17	20	213.87	34.48	60
									Puccetti, F.	2022	212	44	38	212	48	64
									Tu, R.	2019	173	28	39	174	41	663
									Ushimaru, Y.	2019	206.1	5	84	237	5	84
									Wei, M.	2022	198.22	13.14	107	202.5	9.91	88
									Yoon, B. W.	2022	239	36.6	21	273	36.6	42
Operative blood loss (mL)		ICGFL			non-ICGFL				Total lymph nodes harvested		ICGFL			non-ICGFL				Time to first liquid intake (days)		ICGFL			non-ICGFL
author	year	tfmean	tfsd	nt	cfean	cfsd	nc		author	year	tfmean	tfsd	nt	cfean	cfsd	nc		author	year	tfmean	tfsd	nt	cfean	cfsd	nc
Chen, Q. Y.	2020	51.5	133.6	129	54.3	125	129		Chen, Q. Y.	2020	50.5	15.9	129	42	10.3	129		Chen, Q. Y.	2020	3.7	0.9	129	3.8	1.5	129
Chen, X.	2022	117.22	38.36	18	116.05	33.73	38		Chen, X.	2022	34.61	5.87	18	29.92	5.27	38		Huang, Z. N.	2021	3.7	1.2	94	3.5	1.4	94
Huang, Z. N.	2021	45.6	19.1	94	89.6	89.3	94		Cianchi, F.	2020	50.8	17.1	37	40.1	23	37		Liu, M.	2020	7.15	3	65	6.91	4.93	75
Kwon, I. G.	2019	46.8	35.3	40	47.9	42.1	40		Huang, Z. N.	2021	40.8	13.7	94	31.8	13.5	94		Tu, R.	2019	4.8	1.9	39	4.6	1.5	663
Lan, Y.	2017	75.7	96.7	14	78.3	79.8	65		Kwon, I. G.	2019	48.9	14.6	40	35.2	11.2	40		Wei, M.	2022	3.56	1.2	107	3.85	1.18	88
Liu, M.	2020	38.2	18.03	61	49.87	30.73	75		Lan, Y.	2017	35.8	11.4	14	30	11.8	65
Lu, X.	2021	144.64	83.15	28	167.5	141.23	28		Liu, M.	2020	33.72	9.06	61	29.36	8.76	75
Ma, S.	2019	80.1	91.9	38	78.6	89.8	44		Lu, X.	2021	27.5	10.6	28	21.79	6.73	28
Park, S.	2020	82.65	57.88	20	124.02	82.15	60		Park, S.	2020	30.15	9.27	20	32.22	10.03	60
Ushimaru, Y.	2019	10.1	6.6	84	36.9	6.6	84		Ushimaru, Y.	2019	45.7	1.7	84	42.6	1.7	84
Wei, M.	2022	27.51	12.83	107	32.02	17.99	88		Wei, M.	2022	49.55	12.72	107	44.44	10.2	88
									Yoon, B. W.	2022	31.14	8.43	21	31.33	11.95	42
									Zhong, Q.	2021	49.9	14.8	385	42	10.3	129
Metastatic LN harvest Mean (±SD)		ICGFL			non-ICGFL
author	year	tfmean	tfsd	nt	cfean	cfsd	nc
Chen, Q. Y.	2020	5.6	11.2	129	5.7	8.9	129
Chen, X.	2022	3.22	6.28	18	2.71	4.27	38
Cianchi, F.	2020	4.4	6.8	37	4	5.4	37
Liu, M.	2020	1.56	3.21	61	1.44	2.66	75
Puccetti, F.	2022	12	13	38	8	10	64
Wei, M.	2022	6.45	10.96	107	3.33	6.45	88
Zhong, Q.	2021	4.5	8.6	385	5.7	8.9	129
